# Supplementary material for: Association between individual surgeon volume and outcome in mitral valve surgery: a systematic review
Source: PubMed Central journal article supplement — J Thorac Dis. 2021 Jul;13(7):4500–10. doi: 10.21037/jtd-21-578 (PMC8339780; doi:10.21037/jtd-21-578), 2021-07
Supplement: jtd-13-07-4500-supplementary.pdf [file jtd-13-07-4500-supplementary.pdf]

**Search string**

(((((("Mitral Valve Insufficiency"[Mesh]) OR "Mitral Valve Prolapse"[Mesh]) OR "Mitral Valve Stenosis"[Mesh]) OR "Mitral Valve Annuloplasty"[Mesh]) OR mitral valve surgery) OR mitral valve repair)) AND (((high-volume surgeons) OR low-volume surgeons) OR surgeon volume) OR clinician volume) OR physician volume)) AND (((("Cardiac Surgical Procedures/mortality"[Mesh]) OR "Reoperation"[Mesh]) OR repair rate) OR recovery).
